# Supplementary material for: Circulating transforming growth factor-β1 facilitates remyelination in the adult central nervous system
Source: PubMed Central journal article supplement (PMC6508935; doi:10.7554/elife.41869), 2019-05-09
Supplement: elife-41869-fig1-data1.pdf [file elife-41869-fig1-data1.pdf]

# Figure 1-source data 1

| Product Description                              | Relative area of MBP/Olig2 |          | Relative cell number of Olig2 |          |
|--------------------------------------------------|----------------------------|----------|-------------------------------|----------|
|                                                  | Control                    | Serum    | Control                       | Serum    |
| Control (DMSO)                                   | 1                          | 4.075038 | 1                             | 1.540595 |
| DNA-PK Inhibitor II                              | 1.072964                   | 0.816265 | 1.205717                      | 1.965316 |
| GSK-3 Inhibitor X                                | 1.553935                   | 0.841329 | 0.98298                       | 2.020891 |
| Syk Inhibitor                                    | 1.116218                   | 1.040838 | 0.697921                      | 2.024712 |
| ATM/ATR Kinase Inhibitor                         | 1.150339                   | 0.793869 | 1.116171                      | 2.040537 |
| DNA-PK Inhibitor III                             | 1.724457                   | 1.241198 | 0.954285                      | 2.157534 |
| GSK-3 $\beta$ Inhibitor XI                       | 1.35744                    | 1.646938 | 1.060676                      | 1.856841 |
| p38 MAP Kinase Inhibitor                         | 1.431496                   | 1.580869 | 0.980869                      | 2.014143 |
| Purvalanol A                                     | 1.652472                   | 1.343381 | 0.982004                      | 1.571936 |
| PD98059                                          | 1.140504                   | 1.875568 | 0.877135                      | 2.078993 |
| Syk Inhibitor III                                | 0.900556                   | 1.563802 | 0.861825                      | 1.738104 |
| PD169316                                         | 1.469447                   | 1.985862 | 1.147018                      | 1.384028 |
| <b>TGF-<math>\beta</math>RI Kinase Inhibitor</b> | 0.551418                   | 1.363995 | 0.985175                      | 2.081429 |
| Sphingosine Kinase Inhibitor                     | 0.880749                   | 1.983994 | 0.663828                      | 1.03917  |
| MEK Inhibitor II                                 | 0.756446                   | 1.835005 | 1.054865                      | 1.879065 |
| MNK1 Inhibitor                                   | 0.724727                   | 0.899254 | 0.871254                      | 1.12726  |
| GSK-3 $\beta$ Inhibitor VIII                     | 1.910861                   | 1.688785 | 0.594019                      | 1.163565 |
| PKC $\beta$ II/EGFR Inhibitor                    | 0.527494                   | 1.699848 | 0.54238                       | 1.659975 |
